# Supplementary material for: Glucuronidation of drugs in humanized UDP-glucuronosyltransferase 1 mice: Similarity with glucuronidation in human liver microsomes
Source: PubMed Central journal article supplement (PMC4184567; doi:10.1002/prp2.2), 2013-09-03
Supplement: prp20001-e00002-sd1.pdf [file prp20001-e00002-sd1.pdf]

## Supplemental data

### Glucuronidation of drugs in humanized *UDP-glucuronosyltransferase 1* mice: Similarity with glucuronidation in human liver microsomes

Yuki Kutsuno, Kyohei Sumida, Tomoo Itoh, Robert H. Tukey, and Ryoichi Fujiwara

#### Supplemental Figure 1

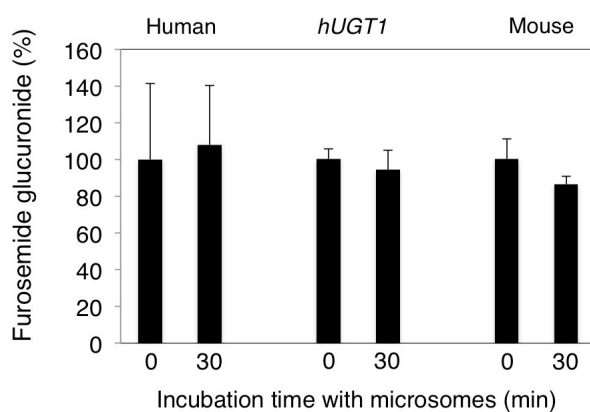

**Supplemental Figure 1. Incubation of furosemide glucuronide with microsomes did not decrease the amount of the acyl-glucuronide.** Furosemide acyl-glucuronide (1  $\mu$ M) was incubated with liver microsomes (0.1 mg/mL) for 30 min. Data are the means  $\pm$  S.D. of three independent determinations.

## Supplemental Figure 2

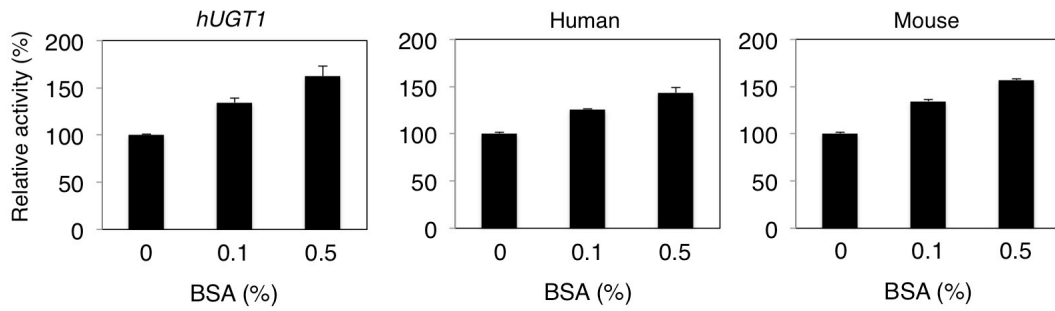

**Supplemental Figure 2. Effects of BSA on furosemide glucuronidation in liver microsomes.** BSA was included in the reaction mixtures (0-0.5%) and the enzyme activities were determined. Data are the means  $\pm$  S.D. of three independent determinations.
